# Supplementary material
Source: PubMed Central journal article supplement (PMC3795472)

# Crystal engineering of green tea epigallocatechin-3-gallate (EGCg) cocrystals and pharmacokinetic modulation in rats

Adam J. Smith<sup>1</sup>, Padmini Kavuru<sup>3</sup>, Kapildev K. Arora<sup>3,4</sup>, Sheshanka Kesani<sup>3</sup>, Jun Tan<sup>2</sup>, Michael J. Zaworotko<sup>3,†</sup>, R. Douglas Shytle<sup>1,2,†</sup>

<sup>1</sup>Center of Excellence for Aging and Brain Repair, Department of Neurosurgery and Brain Repair, USF Health College of Medicine, University of South Florida, Tampa, FL.

<sup>2</sup>Neuroimmunology Laboratory, Silver Child Development Center, Department of Psychiatry and Neurosciences, USF Health College of Medicine, University of South Florida, Tampa, FL.

<sup>3</sup>Department of Chemistry, College of Arts and Sciences, University of South Florida, Tampa, FL. <sup>4</sup>Pfizer Global Research & Development, Groton, Connecticut 06340, United States

<sup>†</sup>Dr. Michael Zaworotko, Department of Chemistry, University of South Florida, College of Arts and Sciences, Tampa, FL, USA 33612, Phone: 813-974-3451; Email: [xtal@usf.edu](mailto:xtal@usf.edu)

<sup>†</sup>Dr. Douglas Shytle, Center of Excellence in Aging and Brain Repair, MDC78, Department of Neurosurgery and Brain Repair, University of South Florida, College of Medicine, Tampa, FL, USA 33612, Phone: 813-974-9171; Fax: 813-974-3078; Email: [dshytle@health.usf.edu](mailto:dshytle@health.usf.edu)

## Supplementary information:

IR, DSC, TGA and PXRD patterns for the reported crystalline forms of EGCg

| <u>Crystalline form</u>             | <u>Page No.</u> |
|-------------------------------------|-----------------|
| Form II                             | S2              |
| Form III                            | S3              |
| Form IV                             | S4              |
| EGCgINM•5H <sub>2</sub> O           | S5              |
| EGCgNIC•9H <sub>2</sub> O           | S6              |
| EGCgINA•3H <sub>2</sub> O & EGCgINA | S7              |
| EGCgNAC•xH <sub>2</sub> O           | S8              |

# Crystalline form: Form II ( $2C_{22}H_{18}O_{11} \cdot 3CH_6CN \cdot 3H_2O \cdot CH_2Cl_2$ )

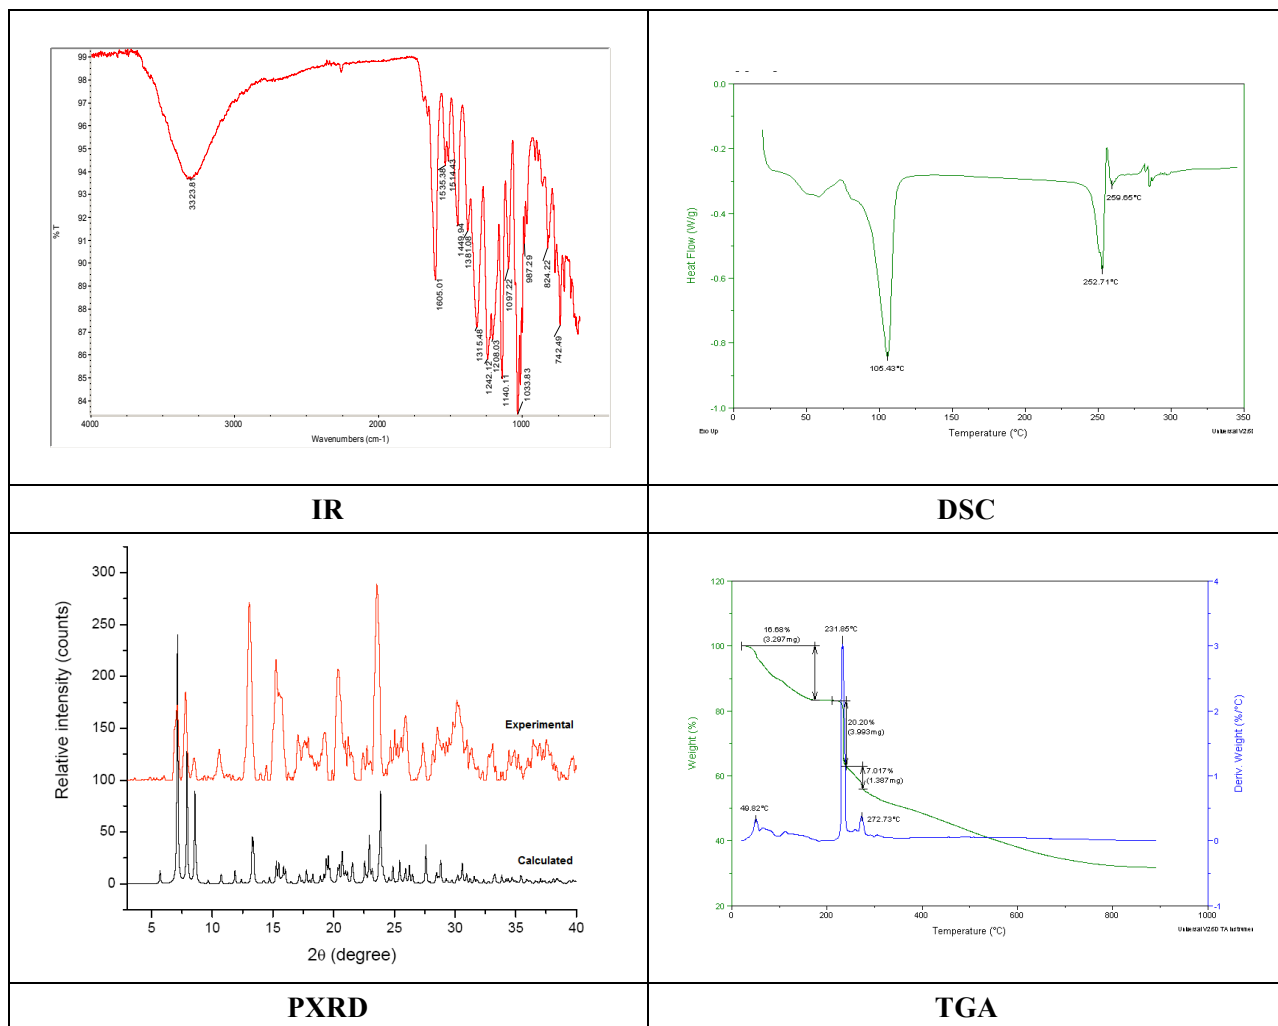

# Crystalline form 2: Form III ( $C_{22}H_{18}O_{11} \cdot C_6H_5NO_2 \cdot H_2O$ )

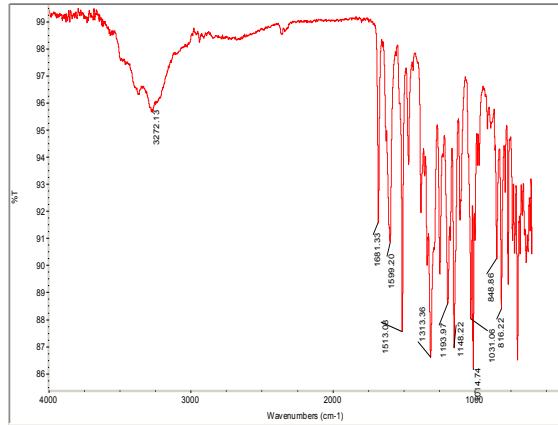

IR

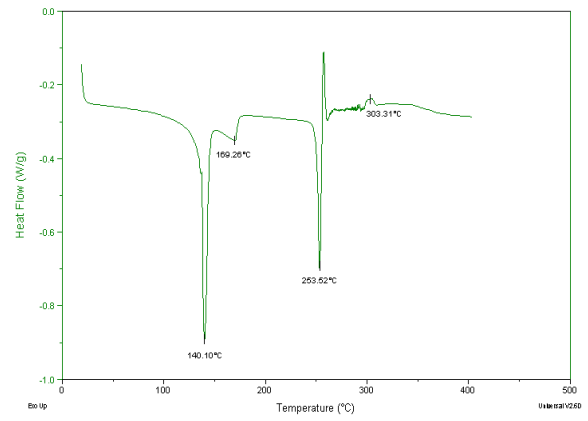

DSC

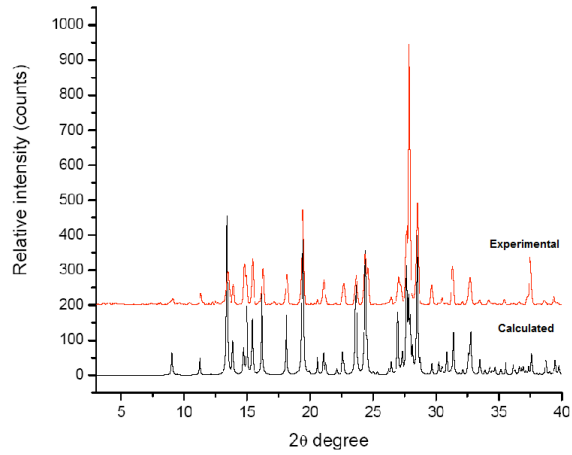

PXRD

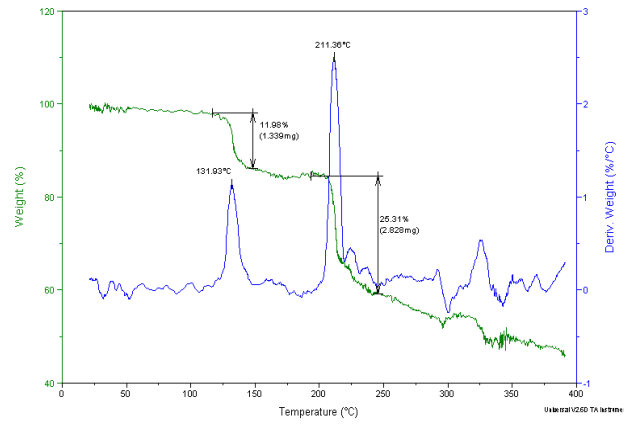

TGA

### Crystalline form 3: Form IV (Pure EGCg)

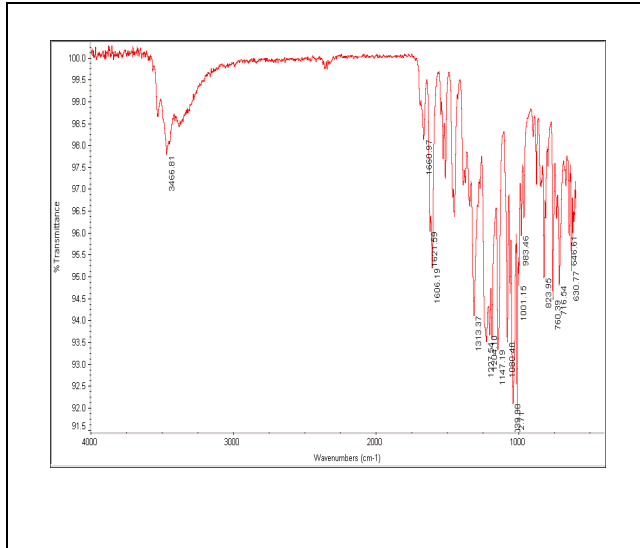

**IR**

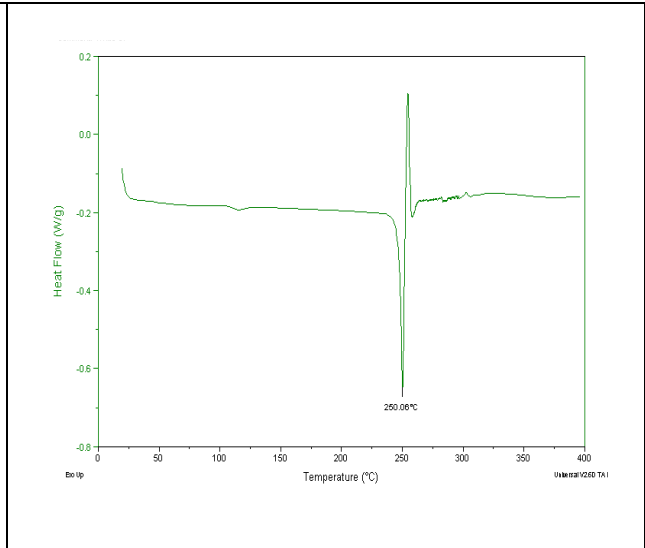

**DSC**

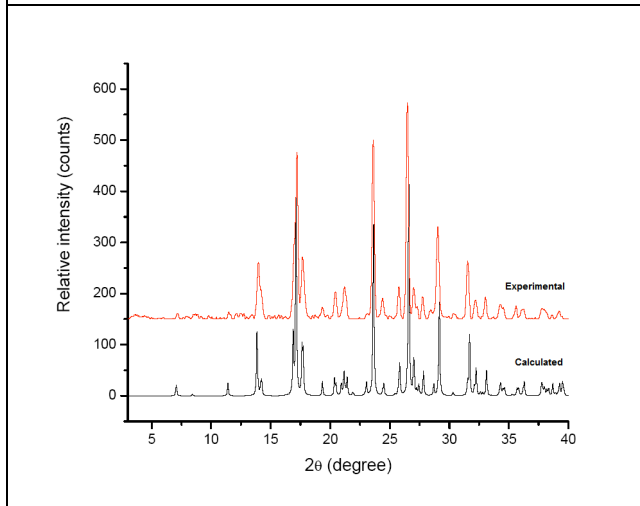

**PXRD**

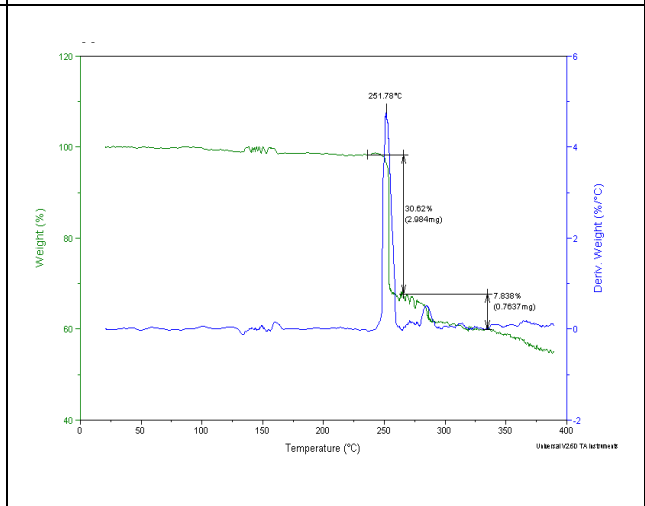

**TGA**

# Crystalline form 4: EGCgINM•5H<sub>2</sub>O

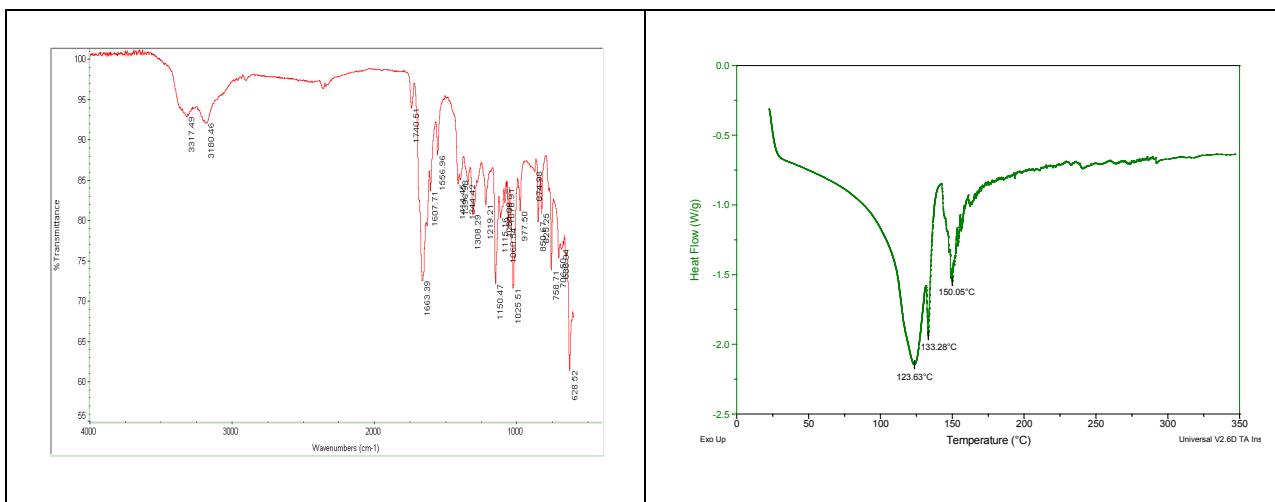

IR

DSC

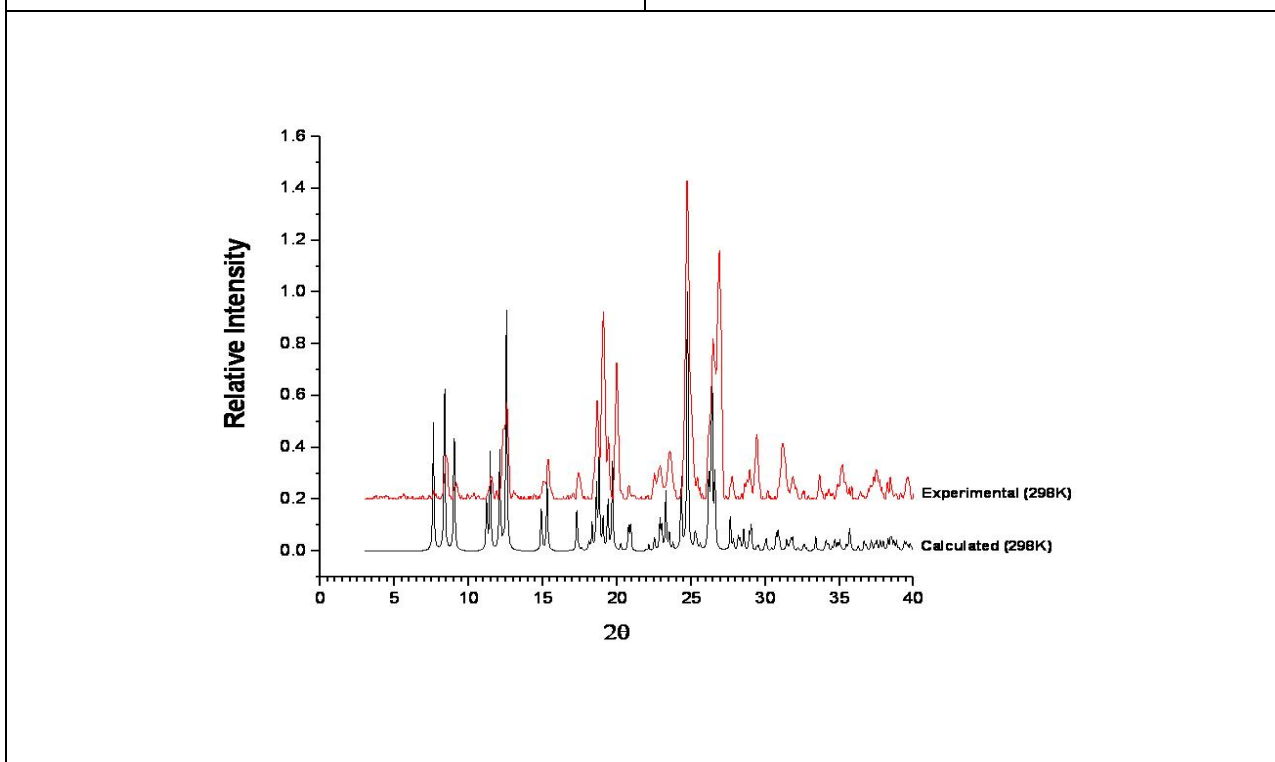

PXRD

# Crystalline form 5: EGCgNIC•9H<sub>2</sub>O

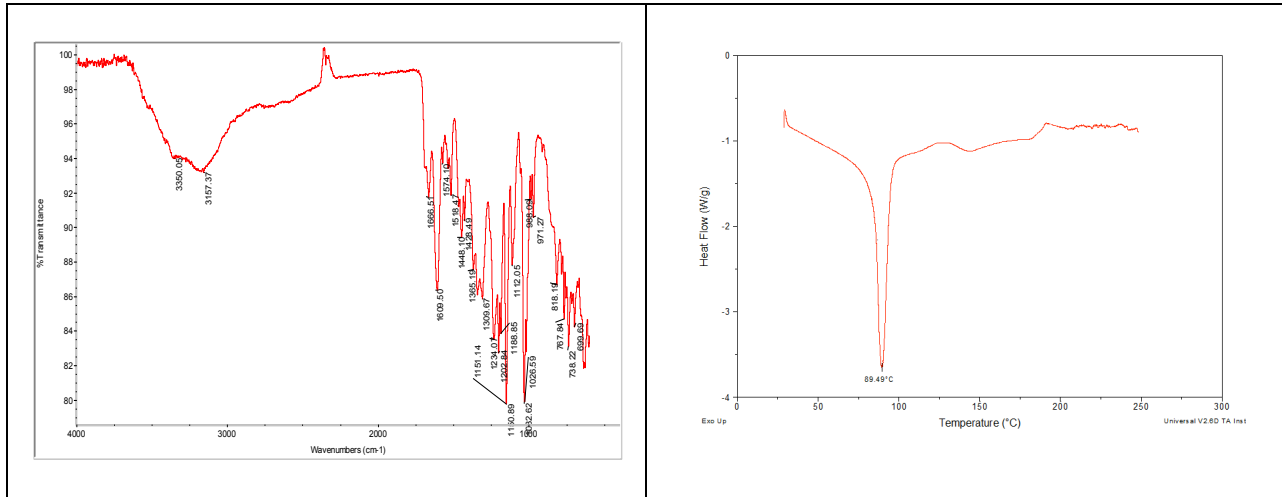

IR

DSC

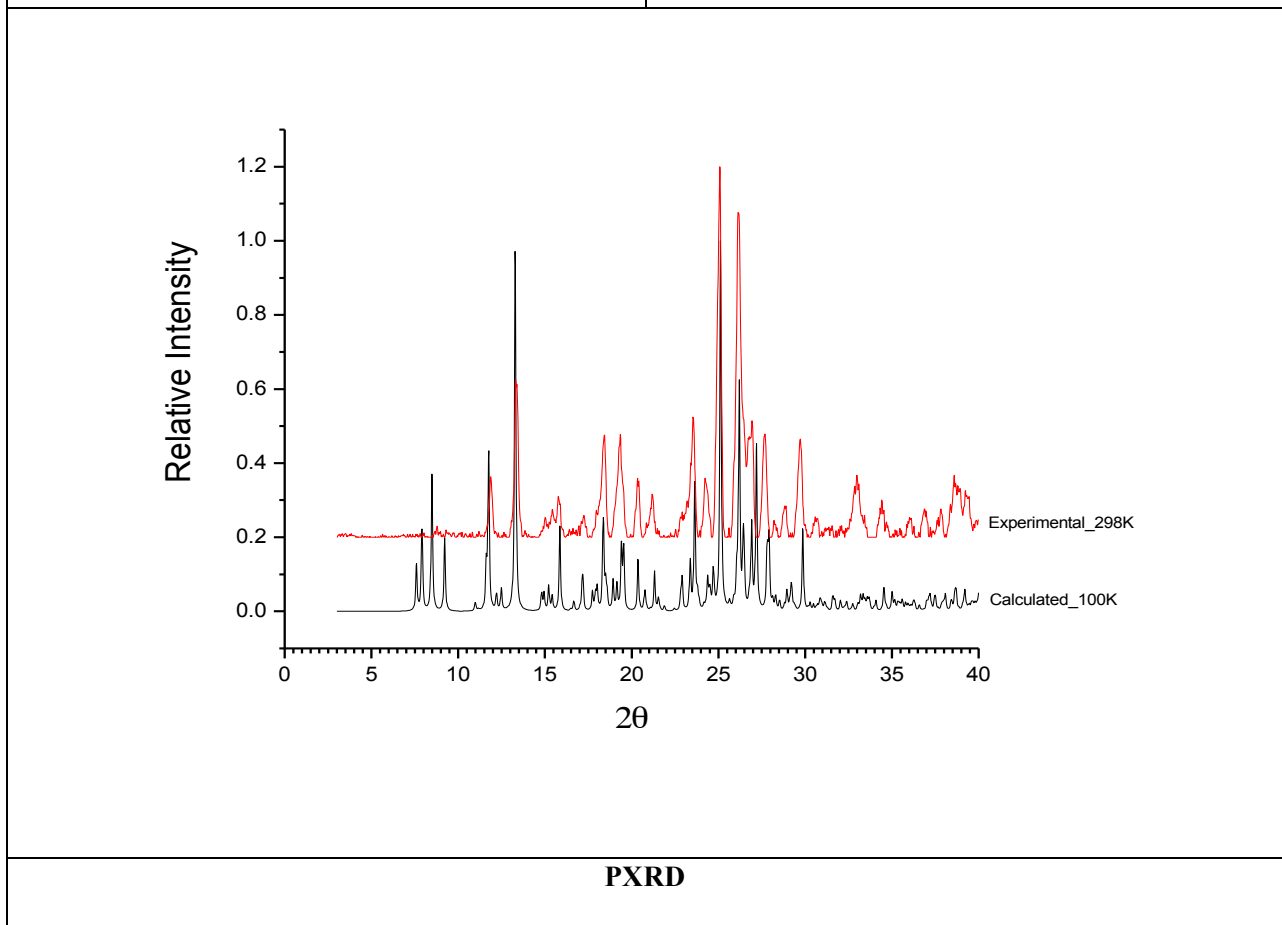

PXRD

## Crystalline form 6: EGCgINA•3H<sub>2</sub>O & EGCgINA

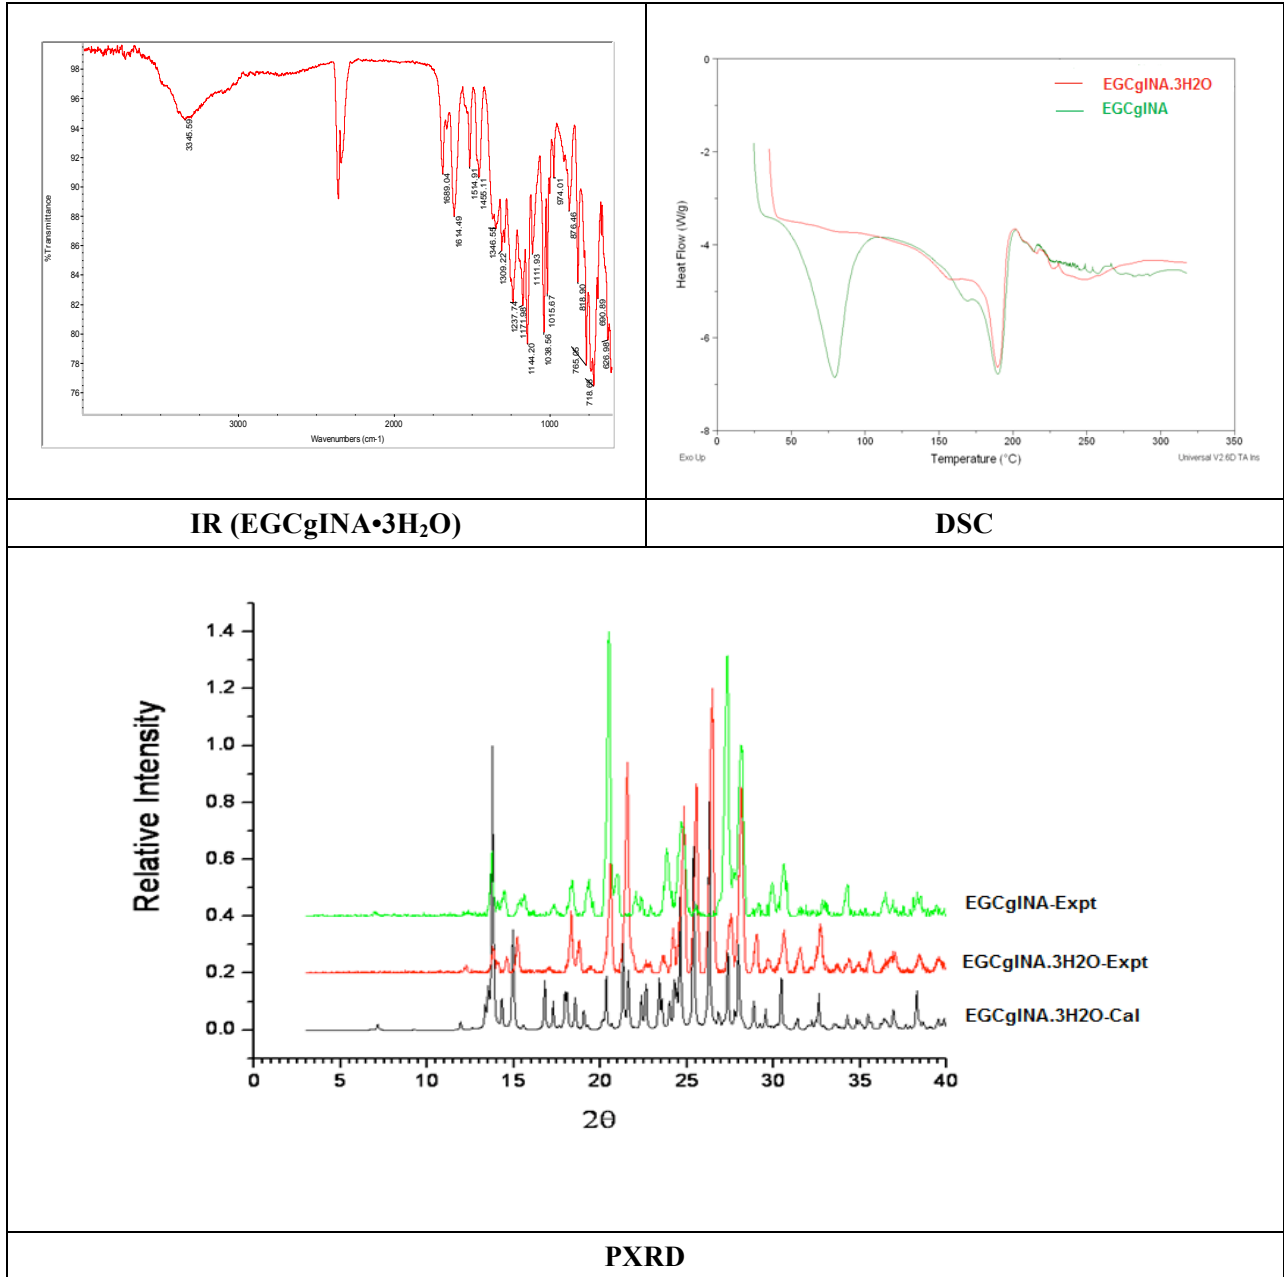

### Crystalline form 7: EGCgNAC·xH<sub>2</sub>O

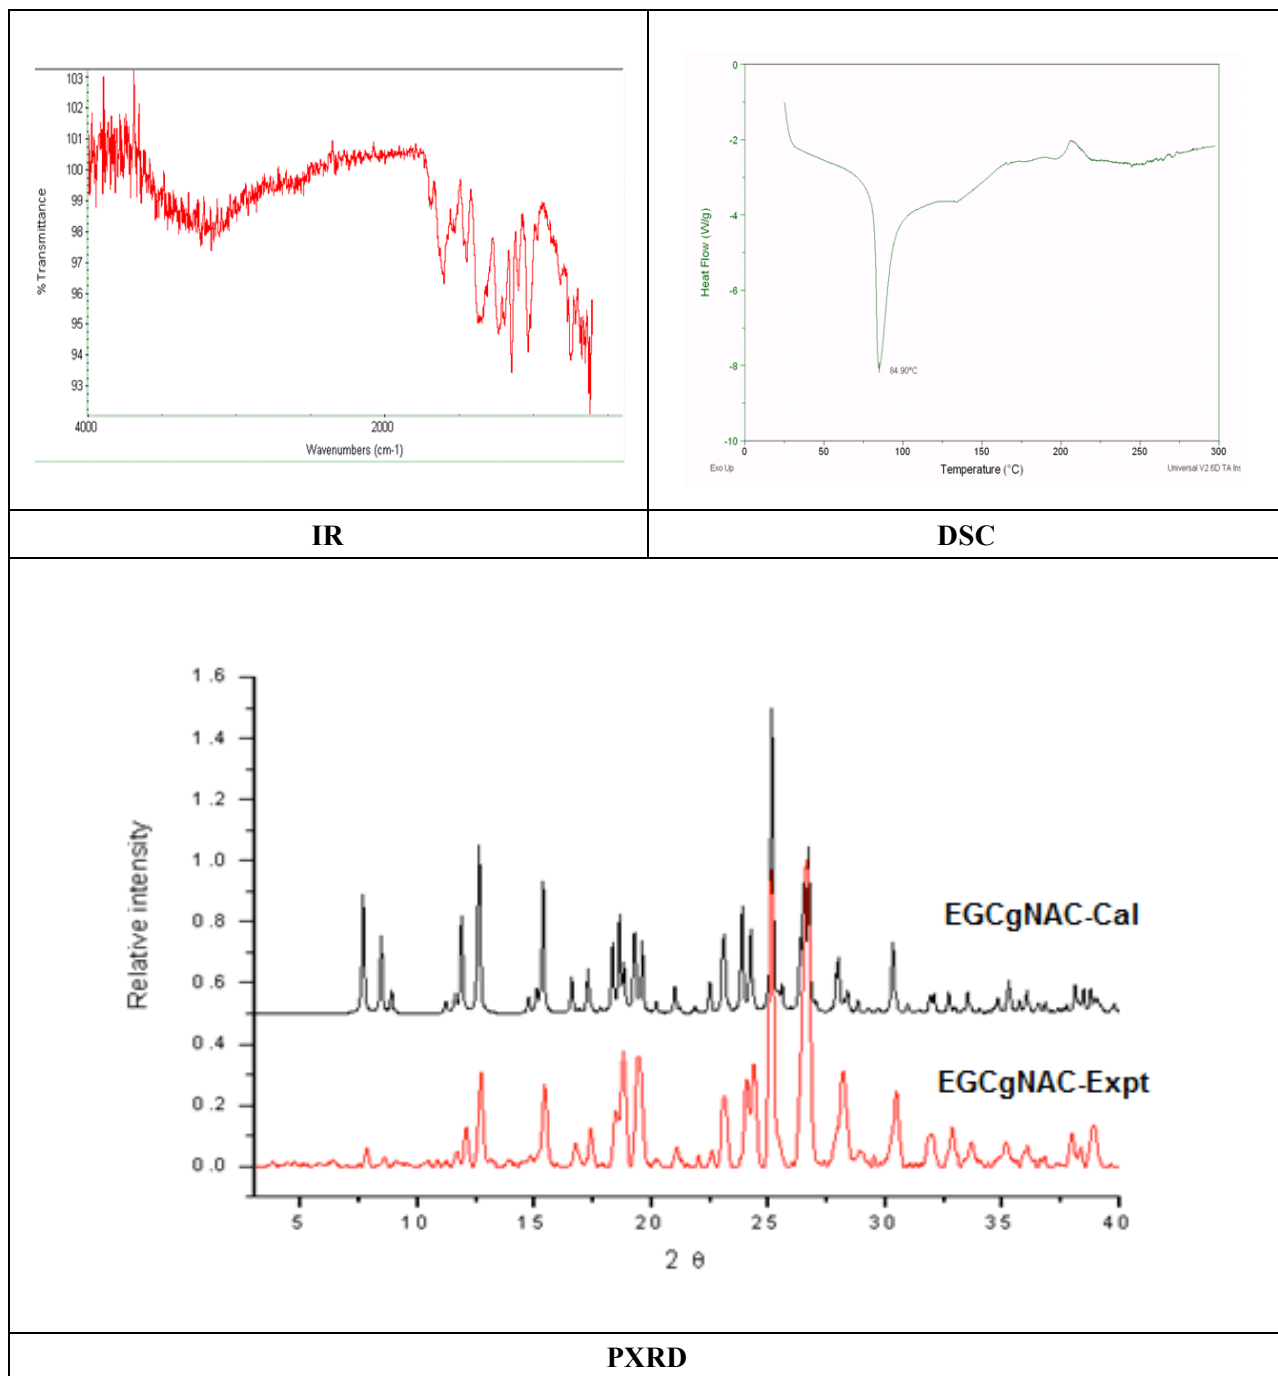

Supplement: mp4000794_si_008.pdf [file mp4000794_si_008.pdf]
